# Supplementary material for: Polyethyleneimine decorated graphene oxide-supported Ni1−xFex bimetallic nanoparticles as efficient and robust electrocatalysts for hydrazine fuel cells
Source: Royal Society of Chemistry journal article supplement (doi:10.1039/c3cy00487b), 2013-01-01
Supplement: c3cy00487b.pdf [file c3cy00487b.pdf]

## Supplementary Materials

# **Polyethyleneimine decorated graphene oxidate-supported Ni<sub>1-x</sub>Fe<sub>x</sub> bimetallic nanoparticles as efficient and robust electrocatalysts for hydrazine fuel cells**

Jing Li, Weijie Tang, Jingwei Huang, Jun Jin\*, and Jiantai Ma\*

State Key Laboratory of Applied Organic Chemistry (SKLAOC), College of  
Chemistry and Chemical Engineering,  
Lanzhou University, Lanzhou, 730000, R. P. China.

E-mail: [jinjun@lzu.edu.cn](mailto:jinjun@lzu.edu.cn); [majiantai@lzu.edu.cn](mailto:majiantai@lzu.edu.cn) ; Fax: +86-931-891-2582;

Tel: +86-931-891-2577

## Table S1

The compositions of the Ni-Fe alloy catalysts derived from inductively coupled plasma spectra(ICP)

| The molar mass of<br>Nickel(II) sulfate (mmol) | The molar mass of<br>Iron(II) sulfate (mmol) | The compositions of the<br>most active catalysts |
|------------------------------------------------|----------------------------------------------|--------------------------------------------------|
| 0.77                                           | 0.09                                         | Ni <sub>90.2</sub> Fe <sub>9.8</sub>             |
| 0.68                                           | 0.18                                         | Ni <sub>79.6</sub> Fe <sub>20.4</sub>            |
| 0.59                                           | 0.27                                         | Ni <sub>70.1</sub> Fe <sub>29.9</sub>            |
| 0.51                                           | 0.36                                         | Ni <sub>60.5</sub> Fe <sub>39.5</sub>            |
| 0.43                                           | 0.45                                         | Ni <sub>49.8</sub> Fe <sub>50.2</sub>            |
| 0.34                                           | 0.54                                         | Ni <sub>39.6</sub> Fe <sub>60.4</sub>            |
| 0.85                                           | 0                                            | Ni <sub>100</sub> Fe <sub>0</sub>                |
| 0                                              | 0.89                                         | Ni <sub>0</sub> Fe <sub>100</sub>                |
